# Supplementary material for: Proteomic and Transcriptomic Responses of the Desiccation-Tolerant Moss Racomitrium canescens in the Rapid Rehydration Processes
Source: MDPI journal article supplement (doi:10.3390/genes14020390), 2023-02-02
Supplement: s1 [file s1]

Table S1. List of primers used in qRT-PCR analysis.

| Unigene        | Forward primer sequence | Reverse primer sequence |
|----------------|-------------------------|-------------------------|
| Unigene0044326 | AGCCTCCGCATTCTGTTCG     | CTCCCAGCACGCATTCCC      |
| Unigene0003124 | CGTTGGAGGAAGTTGTGGAG    | GCTTGTAACCGCCGAAGG      |
| Unigene0009458 | GCAACACCAGCACCGAGAG     | CGCCACGAACAGGAACCAG     |
| Unigene0009493 | TGCTGTGCGGTGGAGATGATG   | GCGGACTCGGACGGAAGATG    |
| Unigene0010441 | GCCGCTGTTCTTTGCTGTG     | GGAATGGAATGAGTTGTTAGTTG |
| Unigene0043420 | ACCAACTGCGGCGACAAG      | CACCTGGACGACGACGATG     |
| Unigene0046204 | GCCGAGGTGAAGCGTATGG     | TTCTTGAGGAGCGAAGGATGC   |
| Unigene0050808 | GGCGGAGCGGAAGCGGAAG     | CGAGGACCTTACGGAACGACTT  |
| Unigene0055922 | GCGTGGATATGGCGAAGTG     | GTCGGCGTTGTCAGTTCC      |
| Unigene0056205 | GAGTGTTGAAGGATTACGAAG   | ATGCCGATGGTGATGAAGAAC   |
| Unigene0056795 | GGCTCCAACACAGGCTACC     | TGTCGTCACTTCCAACCTCTCG  |
| Unigene0058161 | ACGGAGATATTGAAGACACAG   | TCATAACCGATGGCTTGGAAGG  |
| Unigene0060105 | CCGAATCAGGCTACGACAC     | TCCTTCATCTTATCCACCACACC |

Table S2. Number of peptides and proteins identified in desiccated *Racomitrium canescens* of different rehydration stages.

| Sample  | Identified proteins | Identified peptides | Identified spectra |
|---------|---------------------|---------------------|--------------------|
| R0min-1 | 2 677               | 11 878              | 18 028             |
| R0min-2 | 2 667               | 11 674              | 17 942             |
| R0min-3 | 2 568               | 11 127              | 17 352             |
| R1min-1 | 1 815               | 7 462               | 11 758             |
| R1min-2 | 1 497               | 5 690               | 8 926              |
| R1min-3 | 1 745               | 7 184               | 11 156             |
| R6h-1   | 1 590               | 6 081               | 9 204              |
| R6h-2   | 1 794               | 6 914               | 10 722             |
| R6h-3   | 1 706               | 6 681               | 10 559             |

Table S3. Functional annotation of proteins with increased accumulation in *Racomitrium canescens* after 1 min rehydration.

| Categories/annotation                                            | Unigene ID | Mean iBAQ |            |            |
|------------------------------------------------------------------|------------|-----------|------------|------------|
|                                                                  |            | R0min     | R1min      | R6h        |
| <b>Protease and peptidase</b>                                    |            |           |            |            |
| Subtilisin-like protease                                         | 0061971    | 3753133.3 | 9377266.7  | 3194533.3  |
| Aspartic proteinase-like protein 2                               | 0058435    | 3050500   | 4545833.3* | 4925266.7  |
| Aminopeptidase M1                                                | 0024169    | 2434633.3 | 3545133.3  | 3797066.7  |
| Serine carboxypeptidase                                          | 0032483    | 1581220   | 3060133.3  | 4358300    |
| Presequence protease 1, chloroplastic/mitochondrial-like isoform | 0007650    | 1547233.3 | 2342366.7* | 2744033.3  |
| Puromycin-sensitive aminopeptidase isoform X1                    | 0061910    | 1003443.3 | 1653366.7* | 2829466.7  |
| Low-temperature-induced cysteine proteinase                      | 0011055    | 1067796.7 | 1261966.7  | 1765833.3  |
| Leucine aminopeptidase 2, chloroplastic                          | 0038457    | 382420    | 1138693.3  | 609550     |
| Subtilisin-like protease                                         | 0015368    | 212820    | 920570*    | 934406.67  |
| Serine carboxypeptidase-like enzyme                              | 0056687    | 471380    | 833586.67  | 1277066.7  |
| Aspartic proteinase-like protein 2 isoform X2                    | 0002662    | 191866.67 | 471250*    | 795800     |
| Subtilisin-like protease                                         | 0061547    | 246406.67 | 422796.67  | 609606.67* |
| Beta-aspartyl peptidase                                          | 0010440    | 0         | 200686.67* | 194831.67* |
| Probable glutamyl endopeptidase, chloroplastic                   | 0049098    | 37624.667 | 116488*    | 76838.667  |
| <b>Saccharides degradation/metabolism</b>                        |            |           |            |            |
| Alpha-amylase                                                    | 0050221    | 109231.33 | 310554.67  | 266123.33  |
| Alpha-galactosidase 3                                            | 0064191    | 74550.333 | 116676.67* | 190510     |
| Alpha-mannosidase                                                | 0065028    | 414980    | 1046416.7  | 1655200    |
| Alpha-mannosidase isoform X1                                     | 0062067    | 108553.33 | 420846.67  | 705513.33  |
| Alpha-xylosidase 1-like                                          | 0010441    | 600780    | 1030330*   | 1643933.3  |
| Beta-fructofuranosidase                                          | 0046488    | 727190    | 2020300*   | 2704833.3  |
| Beta-galactosidase 9                                             | 0006714    | 129650    | 280663.33  | 412123.33  |
| Endo-1,3;1,4-beta-D-glucanase-like isoform X2                    | 0007756    | 1198200   | 2509900*   | 3394700    |
| Glucan endo-1,3-beta-glucosidase 5-like                          | 0040173    | 0         | 74551.333* | 189996.67* |
| Alpha-xylosidase 1                                               | 0043926    | 349780    | 643040*    | 916100     |
| Mannosylglycoprotein endo-beta-mannosidase-like                  | 0056704    | 190663.33 | 345830*    | 445400     |
| Trehalase                                                        | 0053334    | 264080    | 1096053.3* | 1818900    |
| <b>Redox regulation</b>                                          |            |           |            |            |
| Lambda class glutathione S-transferase                           | 0052456    | 522463.33 | 586026.67  | 124996.67  |
| Mitochondrial Mn-superoxide dismutase                            | 0049856    | 8791200   | 13273333   | 16125000   |
| Peroxidase                                                       | 0043835    | 88252667  | 130136667* | 122654000  |
| Peroxidase                                                       | 0023388    | 60326667  | 85263667   | 41602333   |
| <b>Chromatin structure composition</b>                           |            |           |            |            |
| Histone H2B                                                      | 0002626    | 0         | 22434667*  | 16999933*  |
| Histone H4                                                       | 0030563    | 6273400   | 73637667*  | 89975000   |
| Nucleosome assembly protein family                               | 0010541    | 0         | 346980*    | 632673.33* |

Table S3. Continued

| Categories/annotation                                             | Unigene ID | Mean iBAQ  |            |            |
|-------------------------------------------------------------------|------------|------------|------------|------------|
|                                                                   |            | R0min      | R1min      | R6h        |
| <b>Extracellular matrix substance</b>                             |            |            |            |            |
| Chitinase                                                         | 0076039    | 792553.33  | 1012393.3  | 1442966.7  |
| Laccase-3-like                                                    | 0043730    | 478780     | 1129756.7* | 1147806.7  |
| Pectinesterase-like                                               | 0049397    | 2008400    | 3076366.7  | 13015667   |
| <b>Cytoskeleton related proteins</b>                              |            |            |            |            |
| Actin, plasmodial isoform                                         | 0065906    | 227230     | 429976.67  | 121983.67  |
| Armadillo repeat-containing kinesin A                             | 0003222    | 57459.667  | 99289.667  | 107107.33  |
| Beta-1 tubulin                                                    | 0062682    | 187422.67  | 276800     | 505766.67  |
| Severin                                                           | 0054408    | 0          | 39208*     | 51564*     |
| Tropomyosin-1                                                     | 0062660    | 110066.67  | 650920     | 1454233.3  |
| <b>Lipid metabolism</b>                                           |            |            |            |            |
| Lipocalin-like protein                                            | 0024096    | 1579613.3  | 3637433.3* | 2670066.7  |
| Phospholipase D alpha 1                                           | 0034363    | 2442200    | 3437600    | 3599933.3  |
| Phospholiase C                                                    | 0055013    | 160123.33  | 481880*    | 380893.33  |
| GDSL esterase/lipase                                              | 0037669    | 0          | 472420*    | 410050*    |
| Probable plastid-lipid-associated protein                         | 0059364    | 0          | 44749.333* | 0          |
| Temperature-induced lipocalin                                     | 0022374    | 330806.67  | 1004320*   | 1347916.7* |
| <b>Putative stress related proteins</b>                           |            |            |            |            |
| Nascent polypeptide-associated complex subunit alpha-like protein | 0064085    | 0          | 171056.67* | 222016.67* |
| Niemann-Pick C1 protein                                           | 0062046    | 33968.333  | 61226*     | 40817      |
| Blue copper protein                                               | 0052403    | 0          | 541066.67* | 649040*    |
| LRR receptor-like serine/threonine-protein kinase EFR             | 0037797    | 0          | 1582333.3* | 654836.67* |
| Pyruvate decarboxylase 2 isoform X2                               | 0039848    | 0          | 36131.333* | 57091.5*   |
| Glyoxalase_2 domain-containing protein                            | 0003434    | 1481566.7  | 1829660    | 8862733.3  |
| <b>Ribosome related proteins</b>                                  |            |            |            |            |
| Elongation factor 1-alpha 1                                       | 0004972    | 0          | 37558.667* | 13311*     |
| Elongation factor 1-alpha                                         | 0064711    | 0          | 26960.667* | 35390*     |
| 60S ribosomal protein L15                                         | 0094090    | 122216.67* | 325356.67* | 500320*    |
| 60S ribosomal protein L15                                         | 0078401    | 0          | 171566.67* | 287715*    |
| 116 kDa U5 small nuclear ribonucleoprotein component              | 0039013    | 0          | 32912.333* | 68247.667* |
| 30S ribosomal protein S16-like                                    | 0030011    | 0          | 462276.67* | 587220*    |
| 40S ribosomal protein S9-2                                        | 0054631    | 0          | 243200*    | 1200350*   |
| 60S ribosomal protein l23a                                        | 0052391    | 0          | 574900*    | 1087953.3* |
| Small nuclear ribonucleoprotein Sm D1-like                        | 0071345    | 0          | 189115*    | 161456.67* |
| Ribosome maturation factor rimp                                   | 0023991    | 0          | 269460*    | 527345*    |
| <b>Others</b>                                                     |            |            |            |            |
| Indole-3-acetaldehyde oxidase isoform X7                          | 0008118    | 234473.33  | 273623.33  | 693326.67  |

Table S3. Continued

| Categories/annotation                                                                                                      | Unigene ID | Mean iBAQ |            |            |
|----------------------------------------------------------------------------------------------------------------------------|------------|-----------|------------|------------|
|                                                                                                                            |            | R0min     | R1min      | R6h        |
| Indole-3-acetaldehyde oxidase isoform X5                                                                                   | 0001875    | 0         | 23935.5*   | 13429.667* |
| Metaxin-2, partial                                                                                                         | 0050100    | 0         | 155930*    | 162570*    |
| Calcium-dependent lipid-binding domain-containing protein                                                                  | 0046387    | 1309600   | 14129000*  | 37727667   |
| Chlorophyllase                                                                                                             | 0041131    | 5486166.7 | 6120300    | 16253000   |
| Dihydrolipoyllysine-residue acetyltransferase component 3 of pyruvate dehydrogenase complex, mitochondrial-like isoform X3 | 0060878    | 556463.33 | 871273.33  | 144823     |
| Glutamate dehydrogenase                                                                                                    | 0060503    | 280173.33 | 340333.33  | 688853.33  |
| Isocitrate dehydrogenase [NADP], partial                                                                                   | 0001540    | 0         | 90822.333* | 97978.5*   |
| Nucleoside diphosphate-sugar hydrolase of the mutt (NUDIX) family                                                          | 0044702    | 319573.33 | 551486.67  | 714036.67  |
| AT-hook motif nuclear-localized protein 9-like isoform X2                                                                  | 0053005    | 624590    | 1388206.7  | 3209400    |
| Cell number regulator 10                                                                                                   | 0056278    | 1235440   | 1900876.7  | 2240566.7  |
| Molybdopterin biosynthesis protein CNX1                                                                                    | 0057532    | 116560    | 293970*    | 193061     |
| Phosphoribosylformylglycinamide cyclo-ligase, chloroplastic                                                                | 0002576    | 405816.67 | 702583.33  | 807230     |
| Polyamine oxidase                                                                                                          | 0041109    | 874220    | 1115386.7  | 1978666.7  |
| Uric acid degradation bifunctional protein TTL X2                                                                          | 0050529    | 171973.33 | 561823.33  | 487760     |
| Reticuline oxidase-like protein                                                                                            | 0051668    | 1359260   | 1643100    | 2793566.7  |
| 14-3-3 protein zeta                                                                                                        | 0063616    | 286821.33 | 953256.67* | 1167906.7  |
| 3-isopropylmalate dehydrogenase                                                                                            | 0060015    | 165215.33 | 549920*    | 466200     |
| Aminoacylase-1-like                                                                                                        | 0046482    | 382276.67 | 860683.33* | 660600     |
| Bac_rhamnosid-domain-containing protein                                                                                    | 0044778    | 73814.667 | 260850*    | 276773.33  |
| Pathogenesis-related protein 1-like                                                                                        | 0009084    | 5560766.7 | 7701533.3  | 9689300    |
| Homogentisate 1,2-dioxygenase isoform X1                                                                                   | 0061270    | 29817.667 | 99301.667* | 159752.67  |
| Bifunctional nitrilase/nitrile hydratase NIT4B, partial                                                                    | 0024409    | 265740    | 447440     | 590220     |
| Glutamate decarboxylase                                                                                                    | 0033918    | 278663.33 | 517960     | 746140     |
| Metallo-hydrolase/oxidoreductase                                                                                           | 0043116    | 265497.33 | 405396.67  | 763326.67  |
| NADH dehydrogenase [ubiquinone] 1 alpha subcomplex subunit 13-B-like                                                       | 0042282    | 0         | 215540*    | 212510     |
| N-carbamoylputrescine amidase isoform X2                                                                                   | 0059396    | 290276.67 | 771750*    | 1233273.3  |
| Peptidyl-prolyl cis-trans isomerase CYP38, chloroplastic-like isoform X1                                                   | 0056790    | 2853166.7 | 6896200*   | 9997666.7  |
| Probable L-gulonolactone oxidase 6                                                                                         | 0061206    | 83802     | 210133.33* | 451890     |

Mean iBAQ: mean value of the calculated protein abundance by intensity based absolute quantification method, n=3. R0min, R1min, R6h: *Racomitrium canescens* samples rehydrated from desiccation for 0 min, 1 min and 6 h, respectively. Asterisks indicate proteins reached the significance and the fold change > 1.2 in R1min or R6h samples, respectively.

Table S4. Differently expressed genes belonging to GO term of vacuolar membrane (GO:0005774) significantly increased at 1 minute after rehydration of desiccated *Racomitrium canescens*.

| Unigene ID | Expression trend cluster | Predicted annotation                                                  | Expression                                                                            |
|------------|--------------------------|-----------------------------------------------------------------------|---------------------------------------------------------------------------------------|
| 0006745    | 0                        | chalcone synthase                                                     | 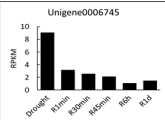   |
| 0016186    | 0                        | H <sup>+</sup> -translocating pyrophosphatase family                  |    |
| 0073914    | 0                        | H <sup>+</sup> -translocating pyrophosphatase family protein, partial |    |
| 0083215    | 0                        | PREDICTED: autophagy-related protein 8C                               |    |
| 0091530    | 0                        | Adenylate cyclase-associated protein                                  |   |
| 0021137    | 16                       | Adenylate cyclase-associated protein                                  |  |
| 0030480    | 16                       | catalase                                                              |  |
| 0059566    | 13                       | SM/Sec1-family protein                                                |  |
| 0059704    | 8                        | CBL-interacting protein kinase                                        |  |
| 0044014    | 25                       | CBL-interacting protein kinase                                        |  |
| 0046204    | 25                       | calcineurin B-like calcium binding protein                            |  |

R0min, R1min, R30min, R45min, R6h, R1d: *Racomitrium canescens* rehydrated for 0 min, 1 min, 30 min, 45 min, 6 h, 1 d, respectively. RKPM: reads per kb per million reads.
